# Supplementary material for: Biomechanical comparison of multilevel lateral interbody fusion with and without supplementary instrumentation: a three-dimensional finite element study
Source: BMC Musculoskelet Disord. 2017 Feb 2;18:63. doi: 10.1186/s12891-017-1387-6 (PMC5290599; doi:10.1186/s12891-017-1387-6)
Supplement: Additional file 1: — Original data of ROM for each LLIF construct with different supplemental instrumentation. (XLSX 58 kb) [file 12891_2017_1387_MOESM1_ESM.xlsx]

## Sheet: Sheet1
Unit：Mpa	Flex	Ext	LB	RB	LR	RR
Intact	3.592	2.492	2.796	2.7101	4.0337	4.2973
SLC	2.34053	2.20215	2.08614	2.42304	1.2777	1.07143
LPC	1.46505	1.89592	1.57048	2.1824	1.22212	1.24217
LC+BPSR	0.524027	0.233881	0.426682	0.498302	0.478936	0.389783
LC+UPSR	0.525689	1.19863	0.453725	1.49026	1.00554	0.565911
	0.854113	0.906147	0.847396	0.816132	0.881266	0.909296	BPSR
	0.85365	0.51901	0.837723	0.450107	0.750715	0.86831	UPSR
	0.592134	0.239198	0.438313	0.194717	0.697023	0.710941	LPC
	0.348404	0.116312	0.253884	0.105923	0.683245	0.750673	SLC
L2/3	Flex	Ext	LB	RB	LR	RR
Intact	5.494	3.946	4.532	4.394	3.202	3.374
SLC	4.0342	3.13045	2.54508	3.12778	1.88503	2.38007
LPC	1.00325	1.64955	1.49084	1.66559	1.16024	1.60829
LC+BPSR	0.829643	0.534111	0.68755	0.802714	0.912149	1.12414
LC+UPSR	0.843967	1.21009	0.670934	1.69767	1.19404	1.40718
	0.848991	0.864645	0.84829	0.817316	0.715131	0.666822	BPSR
	0.846384	0.693338	0.851956	0.613638	0.627094	0.582933	UPSR
	0.817392	0.58197	0.671042	0.62094	0.637651	0.523327	LPC
	0.265709	0.206677	0.43842	0.288171	0.411295	0.294586	SLC
L4/5	Flex	Ext	LB	RB	LR	RR
Intact	5.907	3.134	3.712	3.93	3.804	3.437
SLC	2.40814	2.81888	2.09244	2.69519	1.35791	1.23014
LPC	0.814746	1.40203	1.59053	2.18583	1.16941	0.950537
LC+BPSR	0.546315	0.598741	0.852562	0.994082	0.754586	0.703019
LC+UPSR	0.69156	1.35161	0.870323	1.94004	1.12758	1.01012
	0.907514	0.808953	0.770323	0.747053	0.801634	0.795455	BPSR
	0.882925	0.568728	0.765538	0.506352	0.70358	0.706103	UPSR
	0.862071	0.552639	0.571516	0.443808	0.692585	0.72344	LPC
	0.592324	0.100549	0.436303	0.3142	0.643031	0.642089	SLC
overall	Flex	Ext	LB	RB	LR	RR
Intact	14.993	9.572	11.04	11.0341	11.0397	11.1083
SLC	8.78287	8.15148	6.72366	8.24601	4.52064	4.68164
LPC	3.28305	4.94749	4.65185	6.03382	3.55177	3.801
LC+BPSR	1.89999	1.36673	1.96679	2.2951	2.14567	2.21695
LC+UPSR	2.06122	3.76032	1.99498	5.12797	3.32717	2.98322
	0.873275	0.857215	0.821848	0.792	0.805641	0.800424	BPSR
	0.862521	0.607154	0.819295	0.535261	0.698618	0.731442	UPSR
	0.781028	0.483129	0.578637	0.453166	0.678273	0.657823	LPC
	0.414202	0.148404	0.390973	0.252679	0.590511	0.578546	SLC
